# Supplementary material
Source: PubMed Central journal article supplement (PMC5985657)
Supplement: NIHMS970691-supplement-supplement_1.pdf [file NIHMS970691-supplement-supplement_1.pdf]

**eAppendix.** Choosing Wisely Measure Definitions: Numerator and Denominator Inclusion Definitions

| <b>Choosing Wisely Recommendation</b>                                          | <b>Measure Definition</b>                                                                                                                                   | <b>Numerator</b>                                                                     | <b>Denominator</b>                                                                    | <b>Exclusions</b>                                 |
|--------------------------------------------------------------------------------|-------------------------------------------------------------------------------------------------------------------------------------------------------------|--------------------------------------------------------------------------------------|---------------------------------------------------------------------------------------|---------------------------------------------------|
| Don't do imaging for low back pain within the first 6 weeks                    | % of patients with imaging performed for low back pain within the first 6 weeks                                                                             | Patients $\geq 18$ with low back pain and imaging performed within the first 6 weeks | Patients $\geq 18$ with low back pain                                                 | N/A                                               |
| Don't perform population based screening for 25-OH-vitamin D deficiency        | % of 25-OH-vitamin D deficiency screening performed for nonindicated reasons                                                                                | 25-OH-vitamin D test for patients $\geq 18$ with no indication                       | 25-OH-vitamin D test for adults $\geq 18$                                             | N/A                                               |
| Don't use opioid or butalbital treatment for migraine, except as a last resort | % of patients with migraine who received opioid or butalbital treatment                                                                                     | Prescription for opioid or butalbital following evaluation for migraine              | Patients $\geq 18$ with migraine headache                                             | N/A                                               |
| Don't perform cardiac testing for low-risk patients without symptoms           | % of electrocardiograms, stress tests, and cardiac imaging exams performed on low-risk patients $\geq 18$ without symptoms                                  | Cardiac tests on low-risk patients $\geq 18$ with no symptoms                        | Cardiac tests on patients $\geq 18$                                                   | N/A                                               |
| Don't routinely repeat DEXA scans more often than once every 2 years           | % of DEXA exams followed by a repeat within 2 years                                                                                                         | DEXA exams on women $\geq 18$ repeated within 2 years of prior exam                  | DEXA exams on women $\geq 18$                                                         | Breast cancer diagnosis prior to DEXA result data |
| Don't perform cardiac stress testing prior to low-risk noncardiac surgery      | % of electrocardiograms, stress tests, and cardiac imaging exams performed on low-risk patients $\geq 18$ in the 30 days before low-risk noncardiac surgery | Cardiac tests on low-risk patients $\geq 18$ with no symptoms                        | Cardiac tests on patients $\geq 18$ in the 30 days before low-risk noncardiac surgery | N/A                                               |

DEXA indicates bone densitometry; N/A, not applicable; OH, hydroxy.
